# Supplementary material for: Contribution of mRNA Splicing to Mismatch Repair Gene Sequence Variant Interpretation
Source: PubMed Central journal article supplement (PMC7398121; doi:10.3389/fgene.2020.00798), 2020-07-27

# Supplementary Figure. Sequence traces showing aberrant/alternative splicing

MLH1 c.117-2A>G

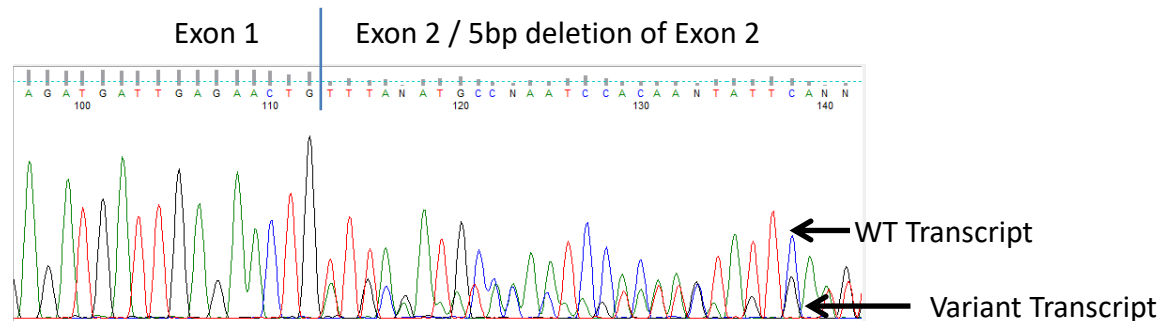

# MLH1 c.454-13A>G

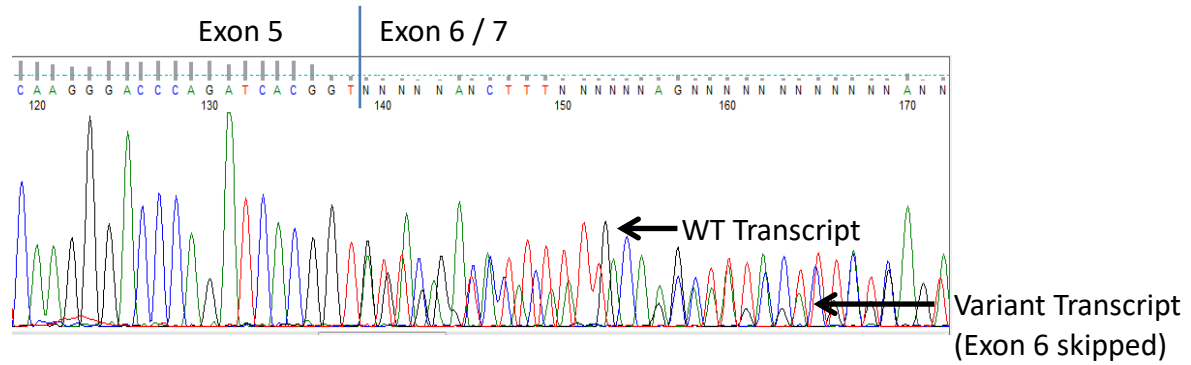

MLH1 c.790+2T>A

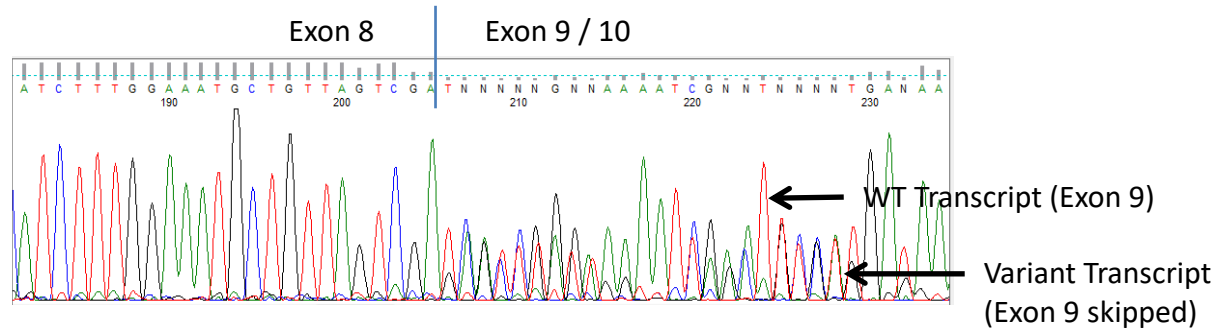

# MLH1 c.923A>C

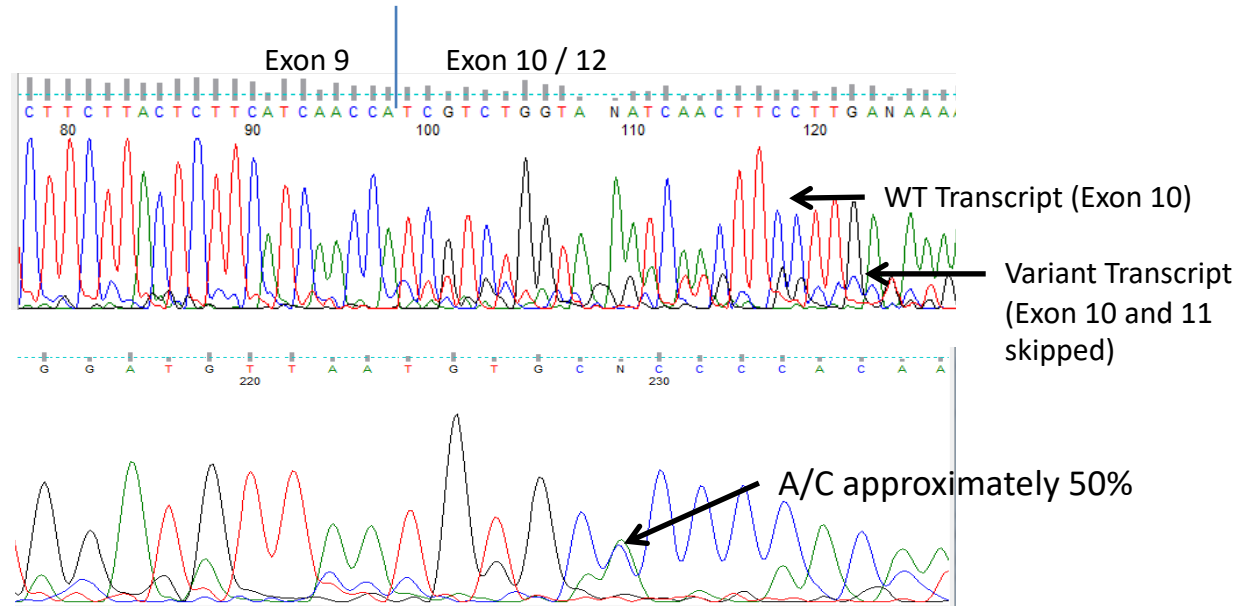

# Control

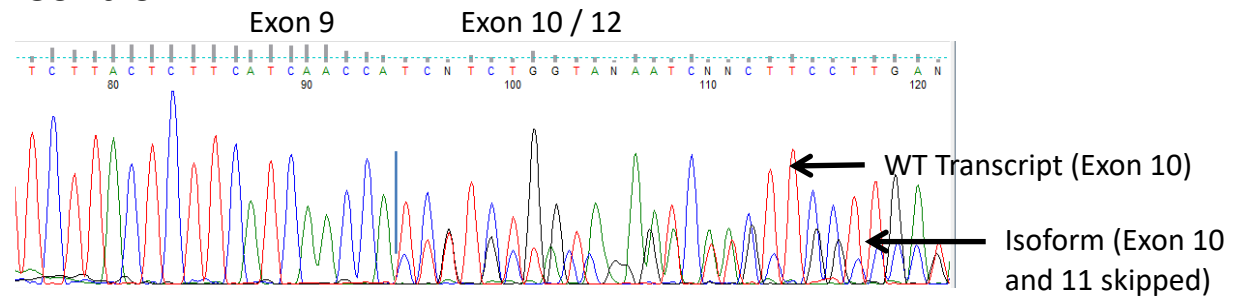

# MLH1 c.1166G>A

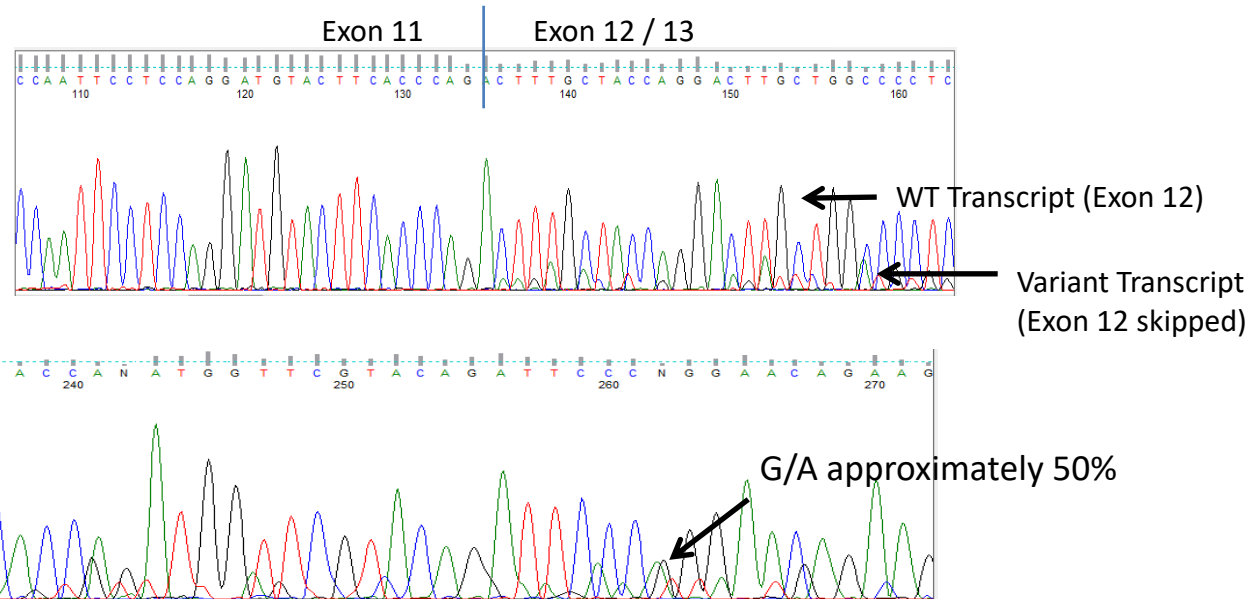

# MSH2 c.1275A>G

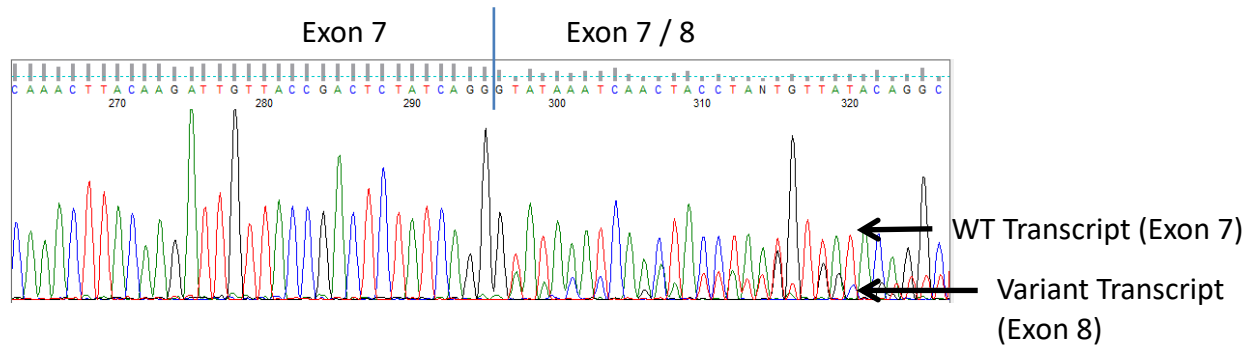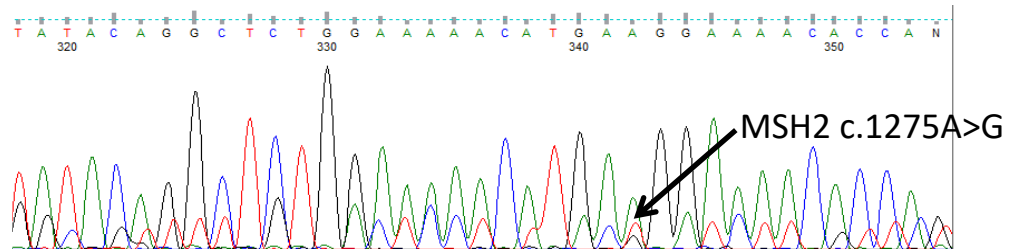

MSH2 c.1661+5G>C

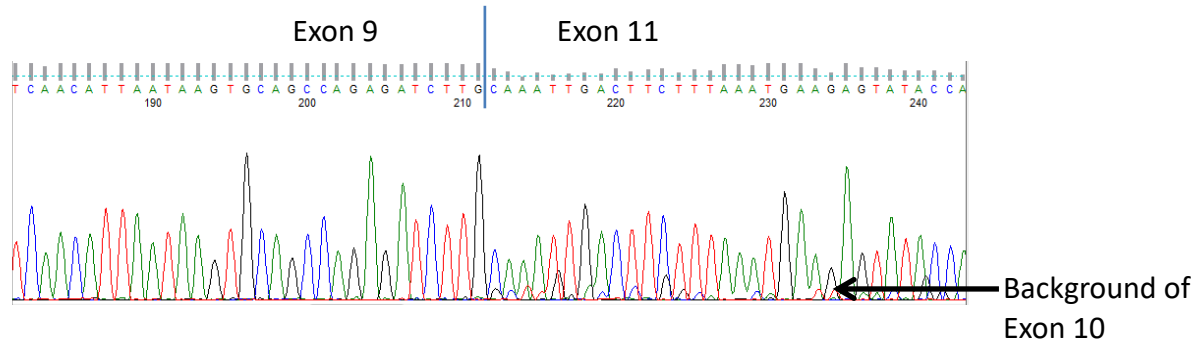

# MSH6 c.2314C>T

*(Exon 4 skipped in Carrier and Control)*

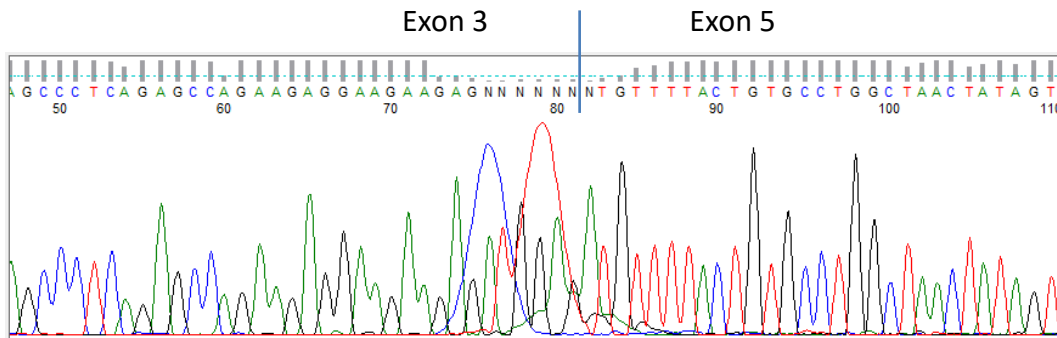

## Wild Type Transcript in variant carrier

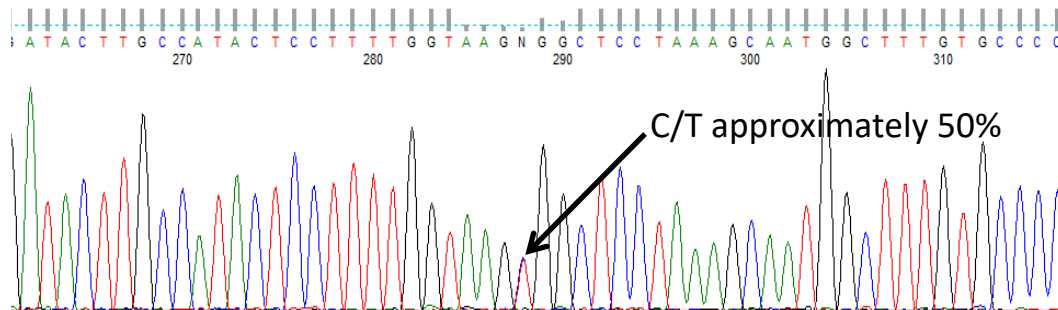

Supplement: Image_1.pdf [file Image_1.pdf]
